# Supplementary material
Source: PubMed Central journal article supplement (PMC2867396)

## Methods

### *Preparation of isolated duodenal villi, pH<sub>i</sub> measurements, calibration, and buffer capacity determination*

For measuring pH<sub>i</sub> in isolated duodenal villi, the duodenum was removed and immediately placed in ice-cold Ringer's solution (solution composition in mM: 147 NaCl, 4 KCl, 2.2 CaCl<sub>2</sub> within 500 μM DTT to prevent the mucus to clog the villi, pH 7.4). The duodenum was sliced into 0.5 cm sections and each section was opened along the mesenteric border. One piece of tissue was transferred onto the cooled stage of a dissecting microscope, and individual villi were detached from the intestine by snapping off the duodenal base with sharpened microdissection tweezers. Care was taken not to damage the apical part of the villi. The villi were attached to a glass coverslip precoated with Cell-Tak adhesive (BD Biosciences, Bedford, MA, USA). Intracellular buffering capacity (β<sub>i</sub>) of duodenal villi was determined as described (2, 3). Briefly, the duodenal villi were perfused with a Na<sup>+</sup> and HCO<sub>3</sub><sup>-</sup>-free solution (using TMA<sup>+</sup> instead of Na<sup>+</sup> in Buffer A: 120 NaCl, 10 HEPES, 5 Tris, 2.25 KH<sub>2</sub>PO<sub>4</sub>, 1.5 K<sub>2</sub>HPO<sub>4</sub>, 1.2 MgSO<sub>4</sub>, 1.2 Ca-Gluconate, 10 glucose, pH7.4) containing varying concentrations of NH<sub>4</sub>Cl. For each NH<sub>4</sub>Cl addition, β<sub>i</sub> was determined as  $\Delta[\text{NH}_4^+]_i/\Delta\text{pH}_i$ , where  $[\text{NH}_4^+]_i$  is  $[\text{NH}_3]_i \times 10^{\text{pK}_a - \text{pH}_i}$ .  $[\text{NH}_3]_i = [\text{NH}_3]_o = [\text{NH}_4^+]_o \times 10^{\text{pH}_o - \text{pK}_a}$ . pH<sub>i</sub> and pH<sub>o</sub> were measured,  $[\text{NH}_4^+]_o$  was known, and pK<sub>a</sub> at 37°C is 8.9. There were no apparent differences in β<sub>i</sub> among different backgrounds of murine duodenal villi. The total buffering capacity (β<sub>total</sub>) was calculated from the equation:  $\beta_{\text{total}} = \beta_i + \beta_{\text{HCO}_3^-} = \beta_i + 2.3 \times S \times \text{Pco}_2 \times 10^{\text{pH}_i - \text{pK}_a}$ , where solubility of CO<sub>2</sub> in cell cytoplasm (we used the value for blood) and pK<sub>a</sub> is 6.36 at HCO<sub>3</sub><sup>-</sup>/CO<sub>2</sub>. Isolated individual villi were loaded for approx. 10min with 16 μM 2',7'-bis(2-carboxyethyl)-5(6)-carboxy-fluorescein acetoxymethyl ester BCECF-AM (Molecular Probes, Leiden, The Netherlands) in Ringer's solution at room temperature. After being loaded, the villi were fixed on the coverslip with a polycarbonate membrane (25 mm diameter, pore size

3  $\mu\text{m}$ , Osmonics, Minnetonka, MN, USA) in a custom-made perfusion chamber, mounted onto the heated (37 °C) stage of an inverted microscope (Zeiss Axiovert 200, Carl Zeiss AG, Jena, Germany). NHE3 activity was measured by  $\text{NH}_4^+$  prepulse technique. The BCECF-loaded villi were perfused with prewarmed (37 °C)  $\text{O}_2$ -gassed buffer A for 20min for a stable baseline reading. Villi were acidified using an ammonium prepulse (40 mM  $\text{NH}_4\text{Cl}$  isotonicly replacing NaCl) for 7 min, then perfused for 4 min with a  $\text{Na}^+$ -free buffer A ( $\text{TMA}^+$  isotonicly replacing  $\text{Na}^+$ ), until  $\text{pH}_i$  reached its lowest value plateau. Subsequently, 50  $\mu\text{M}$  HOE642 (to eliminate NHE1 and NHE2 activity (1), or 50  $\mu\text{M}$  HOE642 with 20  $\mu\text{M}$  S1611 (To inhibit NHE3 activity as well) was added to the  $\text{Na}^+$ -free buffer A. After 2 min, the buffer was switched to  $\text{Na}^+$ -containing buffer B, containing 50  $\mu\text{M}$  HOE642 or 50  $\mu\text{M}$  HOE642 with 20  $\mu\text{M}$  S1611 to eliminate the contributions of NHE1 and NHE2, or NHE1-3.  $\text{Cl}^-/\text{HCO}_3^-$  exchange rate was accessed as changes in intracellular pH after removing  $\text{Cl}^-$  from perfusion buffer. The villi were perfused with prewarmed (37 °C) 5 % $\text{CO}_2$ -gassed buffer B (solution composition in mM: 98 NaCl, 22  $\text{NaHCO}_3$ , 10 HEPES, 5 Tris, 2.25  $\text{KH}_2\text{PO}_4$ , 1.5  $\text{K}_2\text{HPO}_4$ , 1.2  $\text{MgSO}_4$ , 1.2 Ca-Gluconate, 10 glucose, pH 7.4) for 20min. for a stable baseline reading. Villi were alkalisied by removing chloride (Na-gluconate isotonicly replacing NaCl) until stabilized. And then the intracellular pH was back by giving back chloride in the perfusion buffer. The images were digitalized 30s with a cooled CCD camera (CoolSnap ES, Roper Scientific, Ottobrunn, Germany) using the Metafluor software (Universal Imaging Corporation, Downingtown, PA, USA) during exposure of cells to alternating 440 and 495 nm light from a monochromator (Visichrome, Visitron Systems, Puchheim, Germany) with a 515 nm DCXR dichroic mirror and a 535 nm barrier filter (Chroma Technology Corp, Rockingham, VT, USA) in the emission pathway. Individual regions of interest (ROIs) at the tip of the villi were outlined and monitored during the course of the measurement. The rates of  $\text{pH}_i$  change measured in the experiments were converted to proton flux using the equation  $J_{\text{H}^+} = \Delta\text{pH}/\Delta t \times \beta_{\text{total}}$ . Approx. two to three villi were measured per experiment, and the results of

these flux measurements averaged for each mouse.  $n$  is the number of mice that were used for each individual data bar. The 440/495 time course was reproduced from the stored images after background subtraction. Calibration of the 440/495 ratio was performed using the high  $K^+$ -nigericin method (solution composition in mM: 100 potassium gluconate, 20 KCl, 20 NaCl 10 HEPEPS, 2.25  $KH_2PO_4$ , 1.5  $K_2HPO_4$ , 1.2 calcium gluconate, 1.2  $MgSO_4$ , 10 glucose, 10 $\mu$ M nigericin, pH 7.4). In a second step, the steady-state  $pH_i$  in the presence of  $CO_2/HCO_3^-$  was determined by measuring the ratio under steady-state conditions, then performing a two-point calibration at pH 7.2 and 7.6, two values that we expected to be slightly below and above the estimated steady-state  $pH_i$ .

## Reference

1. **Bachmann O, Riederer B, Rossmann H, Groos S, Schultheis PJ, Shull GE, Gregor M, Manns MP, Seidler U.** The  $Na^+/H^+$  exchanger isoform 2 is the predominant NHE isoform in murine colonic crypts and its lack causes NHE3 upregulation. *Am J Physiol Gastrointest Liver Physiol* 287: G125-133, 2004.
2. **Bachmann O, Rossmann H, Berger UV, Colledge WH, Ratcliff R, Evans MJ, Gregor M, Seidler U.** cAMP-mediated regulation of murine intestinal/pancreatic  $Na^+/HCO_3^-$  cotransporter subtype pNBC1. *Am J Physiol Gastrointest Liver Physiol* 284: G37-45, 2003.
3. **Roos A, Boron WF.** Intracellular pH. *Physiol Rev* 61: 296-434, 1981.

## Figure legends

*Figure 1: The effect of S1611 on acid-activated Hoe642 insensitive proton extrusion rate in duodenal and jejunal villous enterocytes. (A)* BCECF-stained microdissected duodenal villi. *(B)* Representative pH trace during the measurement of the buffer capacity by stepwise decrease and increase of the  $\text{NH}_4^+$  concentration. *(C)* Total and intrinsic buffering capacity of the pinched villi from the duodenum and jejunum. *(D)* Representative  $\text{pH}_i$  trace of an  $\text{NH}_4^+$  prepulse experiment that measures the effect of S1611 on NHE3 activity in microdissected duodenal villi. *(E)* Effect of 20  $\mu\text{M}$  S1611 on acid-activated Hoe642-insensitive proton extrusion rate in duodenal and jejunal villi. 40  $\mu\text{M}$  did not cause a stronger inhibition than 20  $\mu\text{M}$  (data not shown).  $n = 5$ , 3-5 individual experiments per mouse.

*Figure 2: Effect of S1611 on steady-state  $\text{pH}_i$  and  $\text{Cl}^-/\text{HCO}_3^-$  exchange rates in microdissected duodenal villi. (A)* S1611 caused a short lasting  $\text{pH}_i$  increase in duodenal villus enterocytes. This  $\text{pH}_i$  increase was not observed when S1611 was added when the cells were acidic, during the  $\text{NH}_4^+$  prepulse experiment shown in Figure 1. Subsequent  $\text{Cl}^-$  removal resulted in a slightly higher alkalization than in duodenocytes not pretreated with S1611, but the  $\text{Cl}^-$  re-addition caused a  $\text{pH}_i$  decline of similar speed and magnitude. Thus, no indication for an increase of a long lasting  $\text{Cl}^-/\text{HCO}_3^-$  exchange rate was found in the experiments.  $n = 3$ , several individual experiments per mouse.

*Figure 3: Effect of the CFTR(inh)-172 on forskolin-stimulated duodenal  $\text{HCO}_3^-$  secretion during  $\text{Cl}^-$  free luminal perfusion in vivo.* The duodenal lumen of anesthetized mice was perfused with  $\text{Cl}^-$  free-solution to inhibit  $\text{Cl}^-/\text{HCO}_3^-$  exchange-mediated  $\text{HCO}_3^-$  secretion.  $10^{-4}$  M forskolin in the luminal perfusate induced a robust secretory response even the absence of luminal  $\text{Cl}^-$ , and the CFTR(inh)-172 inhibited  $>50\%$  of the overall  $\text{HCO}_3^-$  output. Thus, the

inhibitor is reasonably active even with maximal CFTR activation and maximal driving force for electrogenic anion secretion.

*Figure 4: Relative mRNA expression of CFTR, NHE3, Slc26a6 and Slc26a3 in the murine duodenum.* The qPCR was performed in WT mice against  $\beta$ -actin (**A**) and cytokeratin 18 (**B**) as control genes. CFTR and NHE3 showed similar expression levels with any of the control genes, and Slc26a3 and Slc26a6 showed higher expression levels.

Figures

Figure 1

**A**

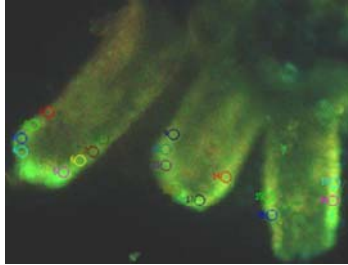

**B**

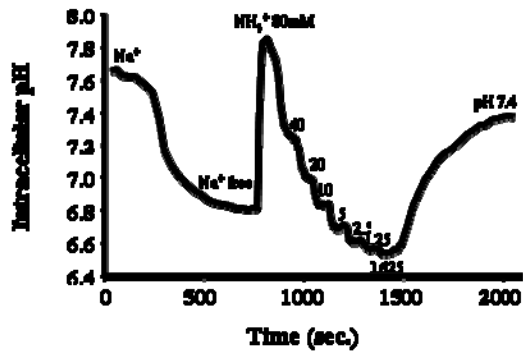

**C**

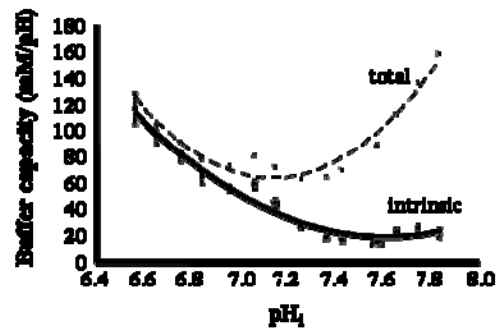

**D**

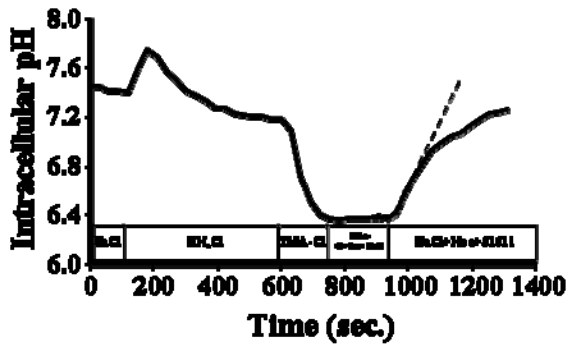

**E**

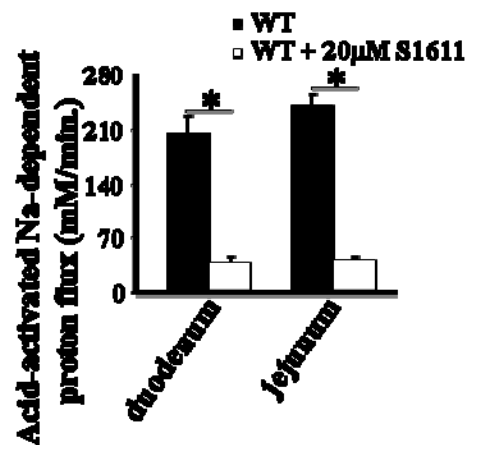

Figure 2

**A**

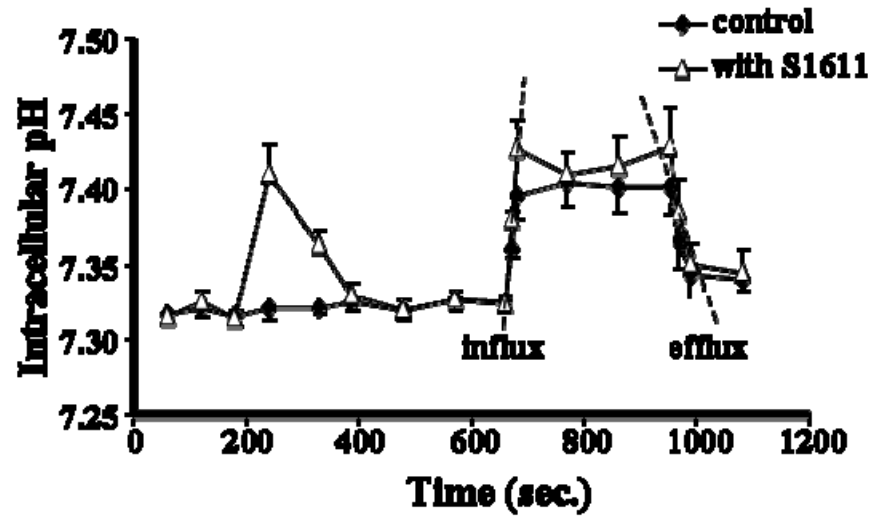

**B**

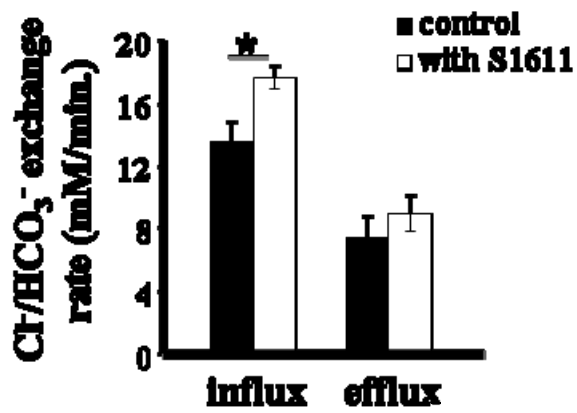

Figure 3

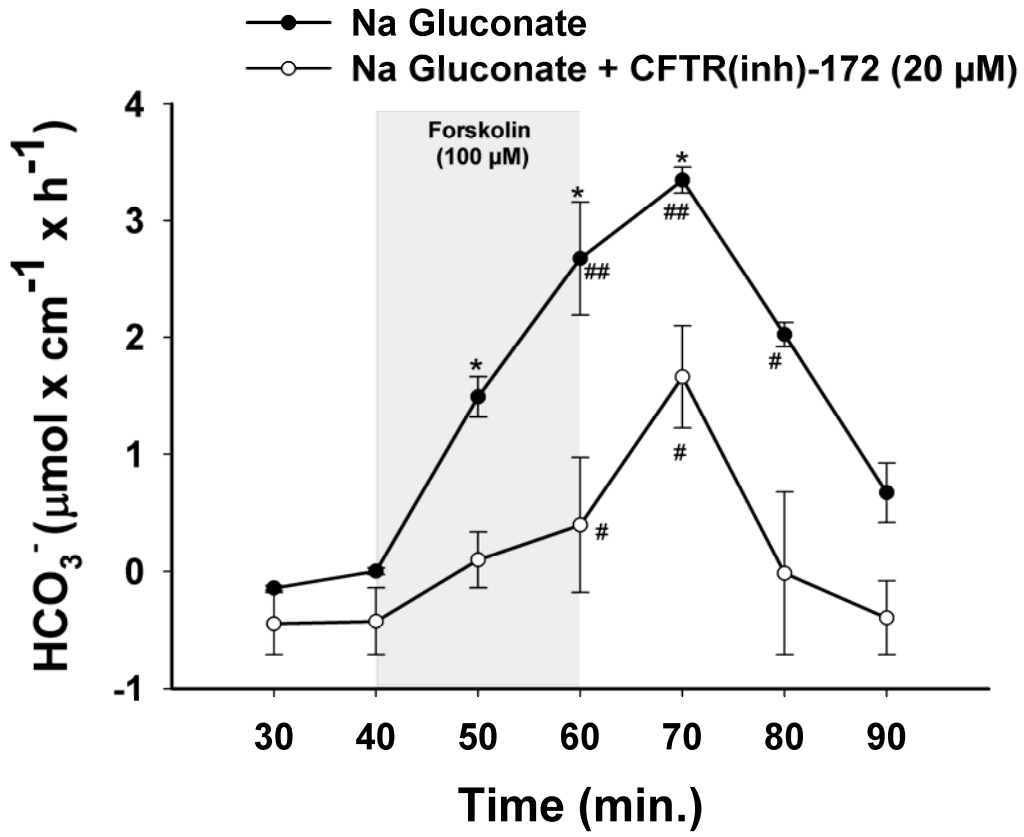



Figure 4:

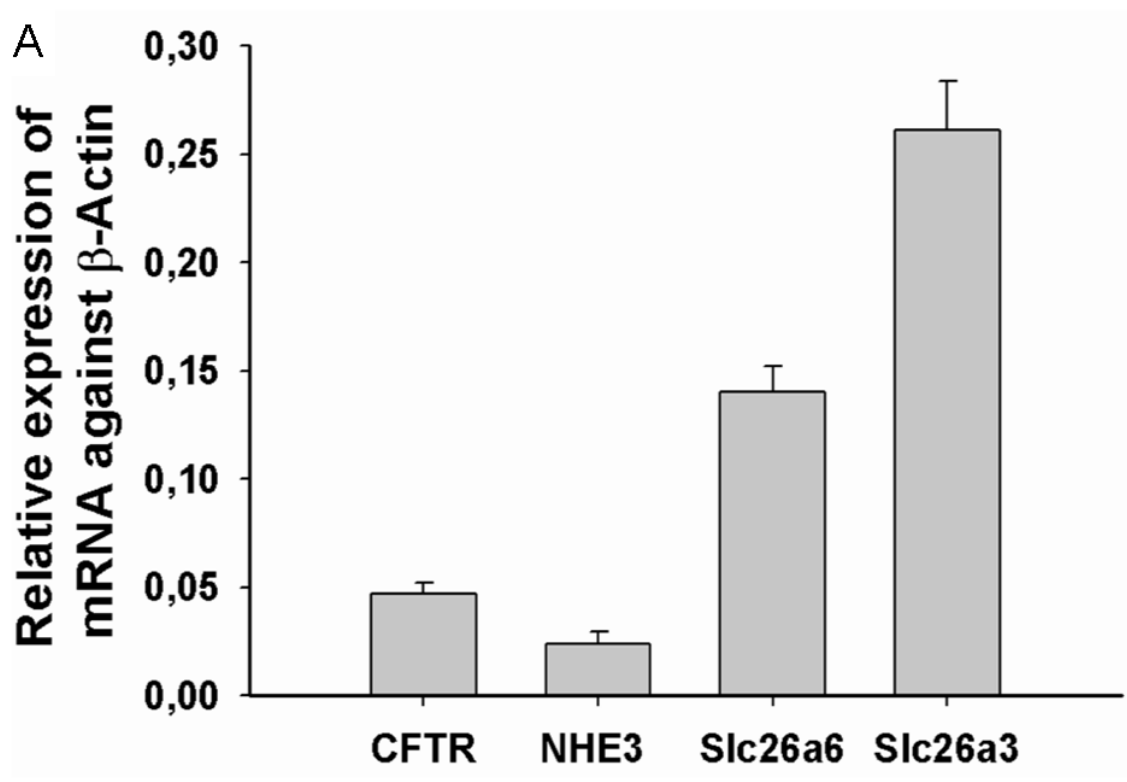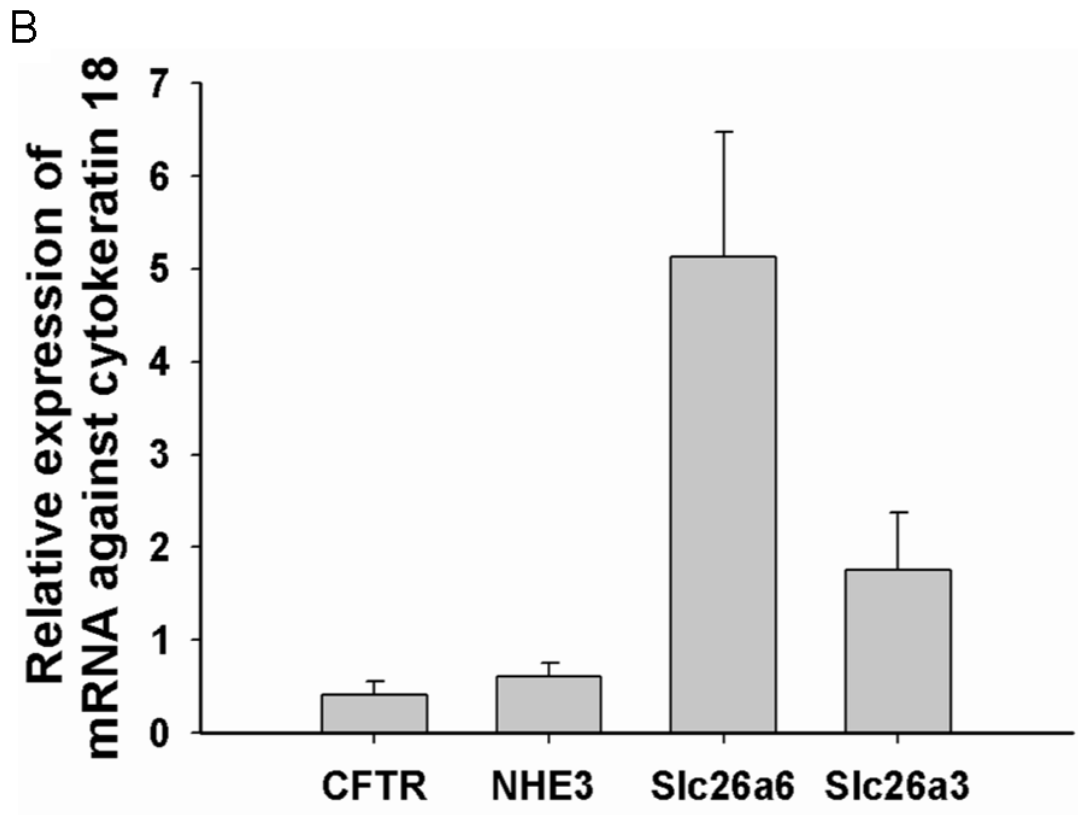

Supplement: 00454.2009_1.pdf [file 00454.2009_1.pdf]
